# Supplementary material for: Community-based intervention to improve dietary habits and promote physical activity among older adults: a cluster randomized trial
Source: PubMed Central journal article supplement (PMC3560222; doi:10.1186/1471-2318-13-8), 2013-01-23
Supplement: 1471-2318-13-8-S3.pdf [file 1471-2318-13-8-S3.pdf]

テイクテン  
**TAKE10!** Check Sheet

● 10ページを参考に10日分の食生活の点数を記入してみましょう ●

|         | 肉                                                                                 | 魚                                                                                 | 卵                                                                                 | 牛乳                                                                                | 大豆                                                                                 | 海藻                                                                                  | イモ                                                                                  | 果物                                                                                  | 油                                                                                   | 野菜                                                                                  | 合計 |
|---------|-----------------------------------------------------------------------------------|-----------------------------------------------------------------------------------|-----------------------------------------------------------------------------------|-----------------------------------------------------------------------------------|------------------------------------------------------------------------------------|-------------------------------------------------------------------------------------|-------------------------------------------------------------------------------------|-------------------------------------------------------------------------------------|-------------------------------------------------------------------------------------|-------------------------------------------------------------------------------------|----|
| 1日目 /   |  |  |  |  |  |  |  |  |  |  |    |
| 2日目 /   |                                                                                   |                                                                                   |                                                                                   |                                                                                   |                                                                                    |                                                                                     |                                                                                     |                                                                                     |                                                                                     |                                                                                     |    |
| 3日目 /   |                                                                                   |                                                                                   |                                                                                   |                                                                                   |                                                                                    |                                                                                     |                                                                                     |                                                                                     |                                                                                     |                                                                                     |    |
| 4日目 /   |                                                                                   |                                                                                   |                                                                                   |                                                                                   |                                                                                    |                                                                                     |                                                                                     |                                                                                     |                                                                                     |                                                                                     |    |
| 5日目 /   |                                                                                   |                                                                                   |                                                                                   |                                                                                   |                                                                                    |                                                                                     |                                                                                     |                                                                                     |                                                                                     |                                                                                     |    |
| 6日目 /   |                                                                                   |                                                                                   |                                                                                   |                                                                                   |                                                                                    |                                                                                     |                                                                                     |                                                                                     |                                                                                     |                                                                                     |    |
| 7日目 /   |                                                                                   |                                                                                   |                                                                                   |                                                                                   |                                                                                    |                                                                                     |                                                                                     |                                                                                     |                                                                                     |                                                                                     |    |
| 8日目 /   |                                                                                   |                                                                                   |                                                                                   |                                                                                   |                                                                                    |                                                                                     |                                                                                     |                                                                                     |                                                                                     |                                                                                     |    |
| 9日目 /   |                                                                                   |                                                                                   |                                                                                   |                                                                                   |                                                                                    |                                                                                     |                                                                                     |                                                                                     |                                                                                     |                                                                                     |    |
| 10日目 /  |                                                                                   |                                                                                   |                                                                                   |                                                                                   |                                                                                    |                                                                                     |                                                                                     |                                                                                     |                                                                                     |                                                                                     |    |
| 10日間の合計 |                                                                                   |                                                                                   |                                                                                   |                                                                                   |                                                                                    |                                                                                     |                                                                                     |                                                                                     |                                                                                     |                                                                                     |    |

10日分の合計点数を見てみると、あなたがどんな食品にかたよって食べているか、どんな食品をあまり食べていないかがわかります。  
この点数表を参考にしてバランスのとれた食事を心がけましょう。
